# Supplementary material for: A Perilipin Affects Lipid Droplet Homeostasis and Aerial Hyphal Growth, but Has Only Small Effects on Virulence in the Insect Pathogenic Fungus Beauveria bassiana
Source: MDPI journal article supplement (doi:10.3390/jof8060634), 2022-06-15
Supplement: s1 [file s1]

Supplementary Materials

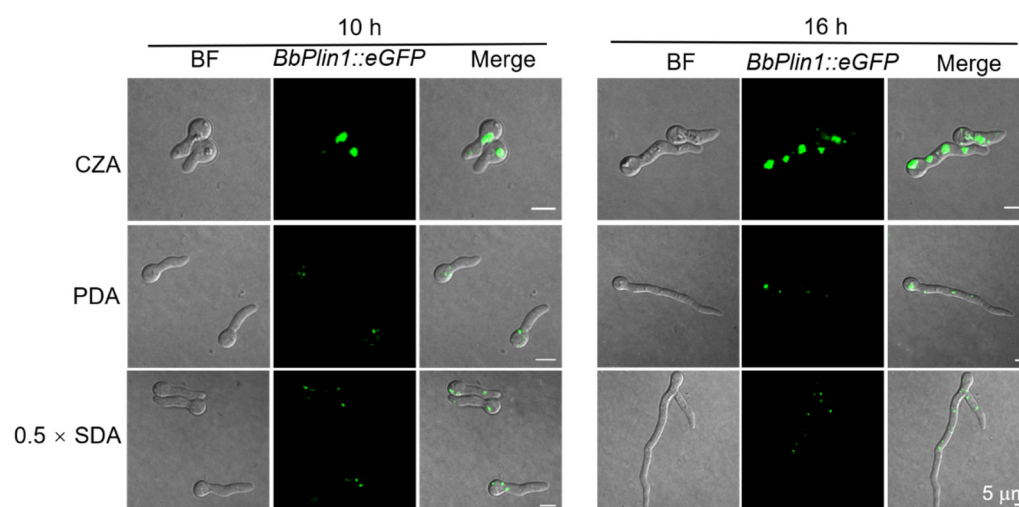

**Figure S1.** Protein expression analysis of *BbPlin1::eGFP* production on solid media. Fungal conidia were harvested from *BbPlin1::eGFP* grown on PDA for 2 weeks at 26°C. GFP signal was observed using the *B. bassiana BbPlin1::eGFP* strain cultured on CZA, PDA and 0.5 × SDA media for 10 and 18 h at 26°C. BF, bright field. Bar, 5 µm.

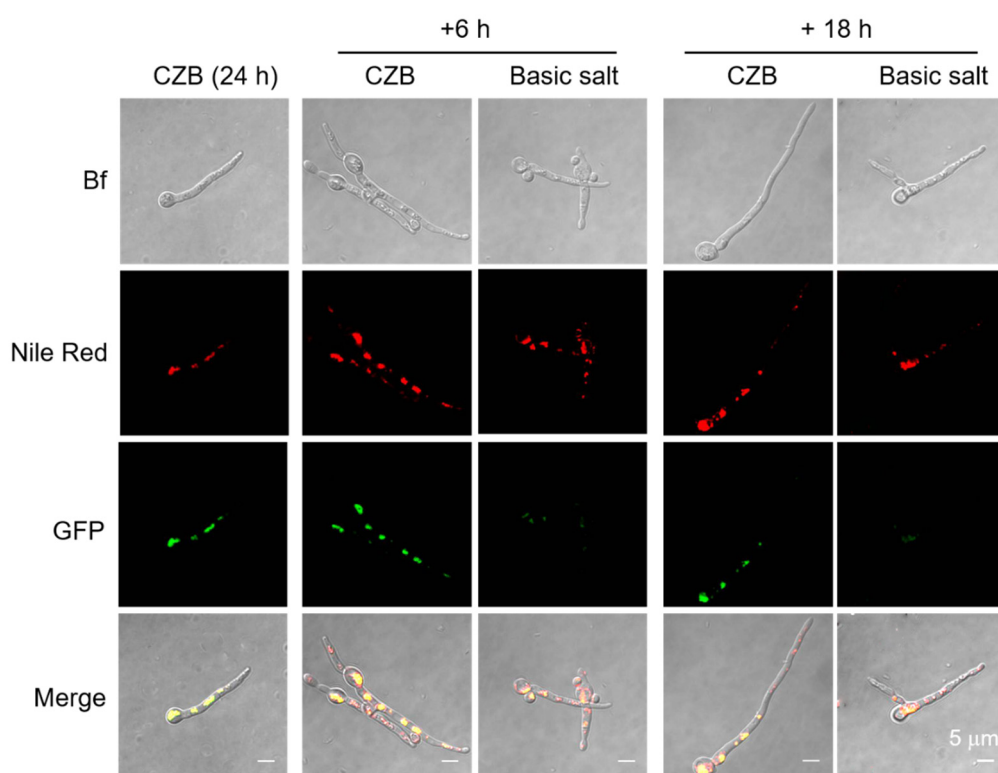

**Figure S2.** Protein expression analysis of *BbPlin1::eGFP* production under starvation conditions. Fungal conidia were harvested from *BbPlin1::eGFP* grown on PDA for 2 weeks at 26°C. The *B. bassiana BbPlin1::eGFP* strain was pre-cultured in CZB for 24 h and fungal cells were collected by centrifugation and washed with sterile water. Fungal cells were then inoculated into basic salts solution without nutrients and cultured for 6 and 18 h before visualization via confocal fluorescent microscopy. BF, bright field. Bar, 5 µm.

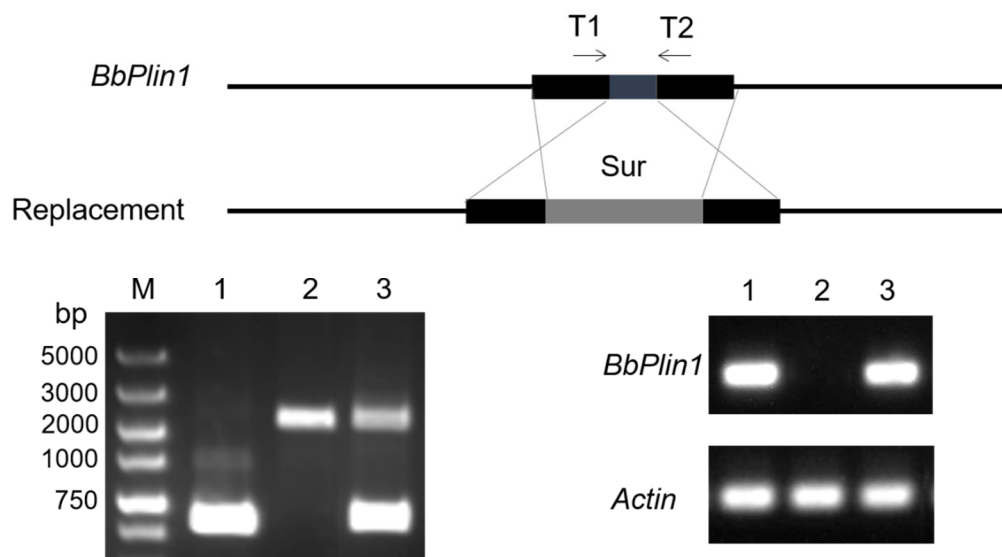

**Figure S3.** Screening of *B. bassiana*  $\Delta BbPlin1$  knockout mutants. (A) Schematic of construction of *BbPlin1* mutants. (B) Confirmation of *BbPlin1* knockout strains by PCR. Lane M, Marker 5000. Lane 1–3 show the *B. bassiana* wild type,  $\Delta BbPlin1$  mutant, and  $\Delta BbPlin1^C$  complemented strains respectively. (C) Real-time PCR analysis of *BbPlin1* expression in indicated strains. All experiments were performed using three technical replicates and the entire experiment performed three times.

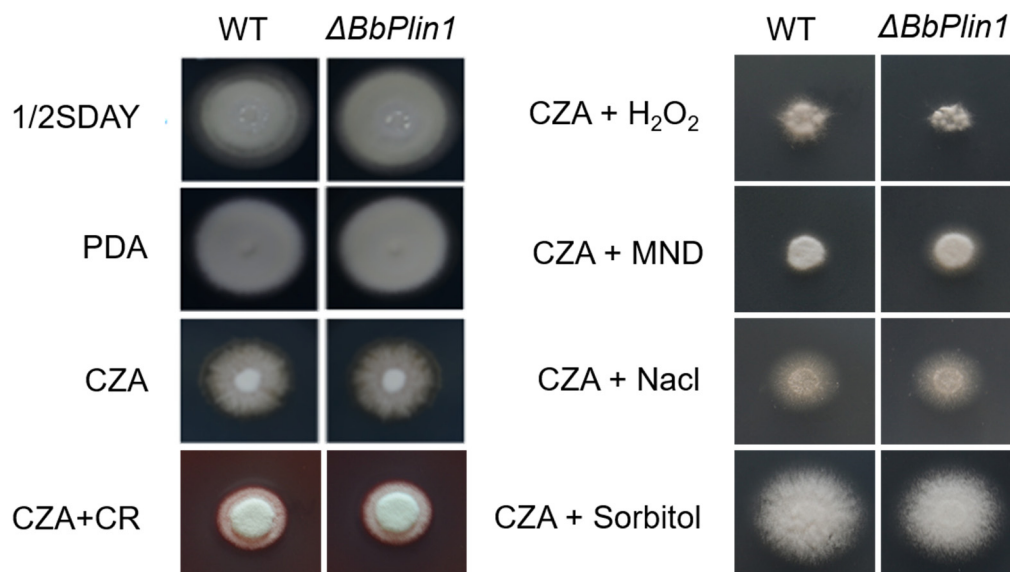

**Figure S4.** Effects of loss of *BbPlin1* on growth phenotypes and stress responses of *B. bassiana*. Fungal conidia were harvested from *B. bassiana* wild type (WT) and mutant ( $\Delta BbPlin1$ ) grown on PDA for 2 weeks at 26°C. Conidial suspensions (2  $\mu$ l,  $1 \times 10^6$  conidia/ml) of indicated fungal strains were inoculated on CZA, PDA, 0.5  $\times$  SDA, and CZA amended with indicated stress causing agents, including 3 mM H<sub>2</sub>O<sub>2</sub>, 30 mM MND, 0.7 M NaCl, 1.2 M Sorbitol, 25  $\mu$ g/mL Congo Red (CR). Plates were incubated at 26°C for 8 d before being photographed.

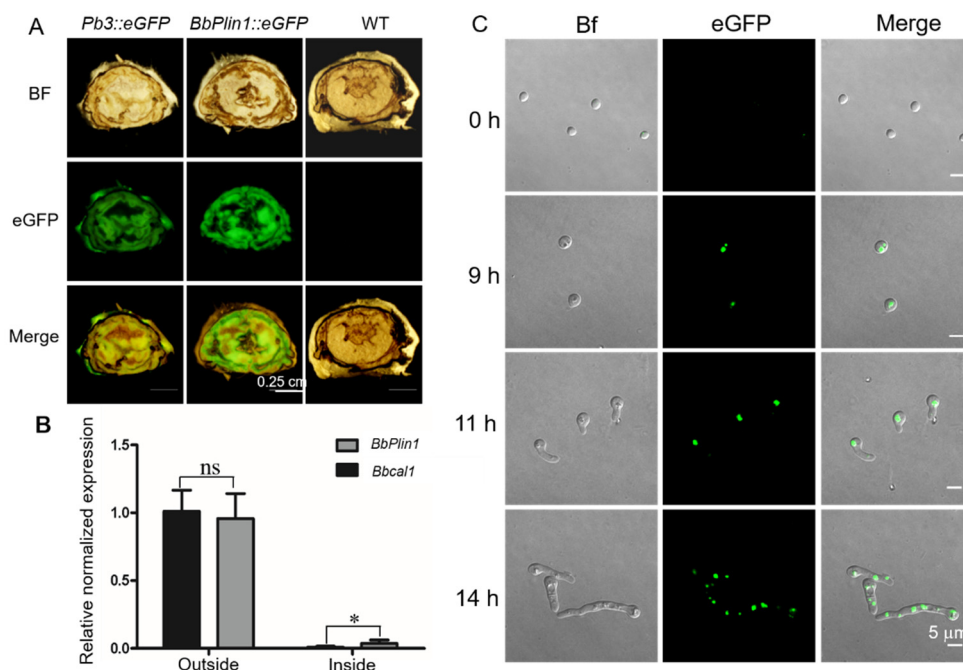

**Figure S5.** Expression analysis of *BbPlin1* *B. bassiana* growing within versus growing on the surface of insect cadavers. (A) GFP signal of *B. bassiana* fungal cells harboring the *BbPlin1::eGFP* construct growing within the insect host and on the surface of cadavers observed in transverse sections of the cadavers. *B. bassiana* harboring the *Pb3::eGFP* construct which contains a constitutive promoter *PgpdA* (*Pb3*) during eGFP expression was used as a positive control. (B) Expression analysis of *BbPlin1* and *BbCal1* in *B. bassiana* wild type cells isolated from growth (i) within, and (ii) on the surface of cadavers. (C) Expression analysis of *BbPlin1* of *B. bassiana* *PbPlin1::eGFP* conidia harvest from cadavers and allowed to germinate in PDA media. Fungal conidia were harvested from indicated *B. bassiana* strains grown on PDA for 2 weeks at 26°C. BF, bright field. Bar, 5  $\mu$ m. All experiments were performed using three technical replicates and the entire experiment performed three times. Stars represent statistical difference (\*  $p < 0.05$ ; ns, no significant,  $t$  test).

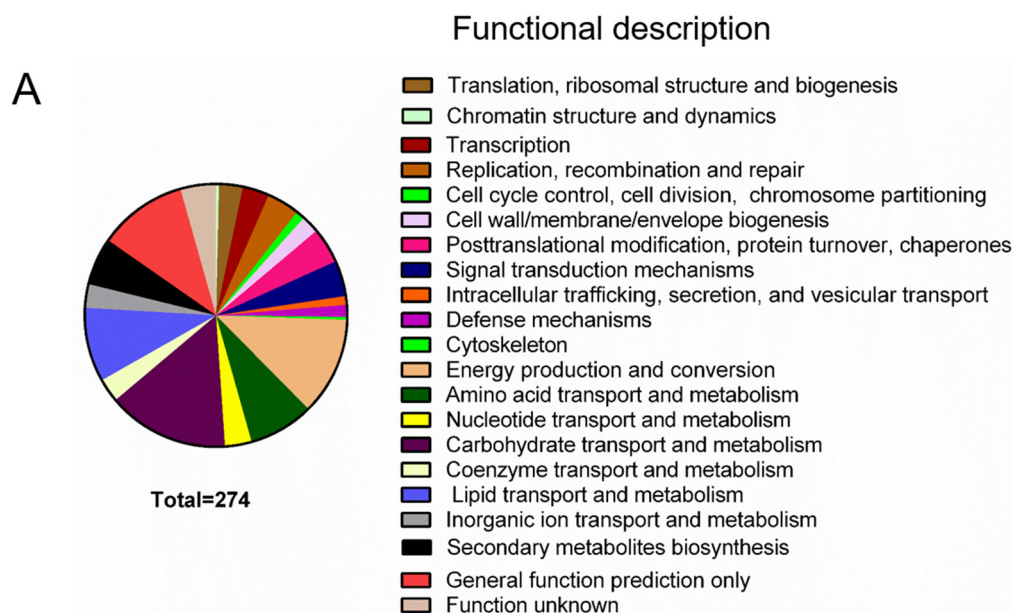

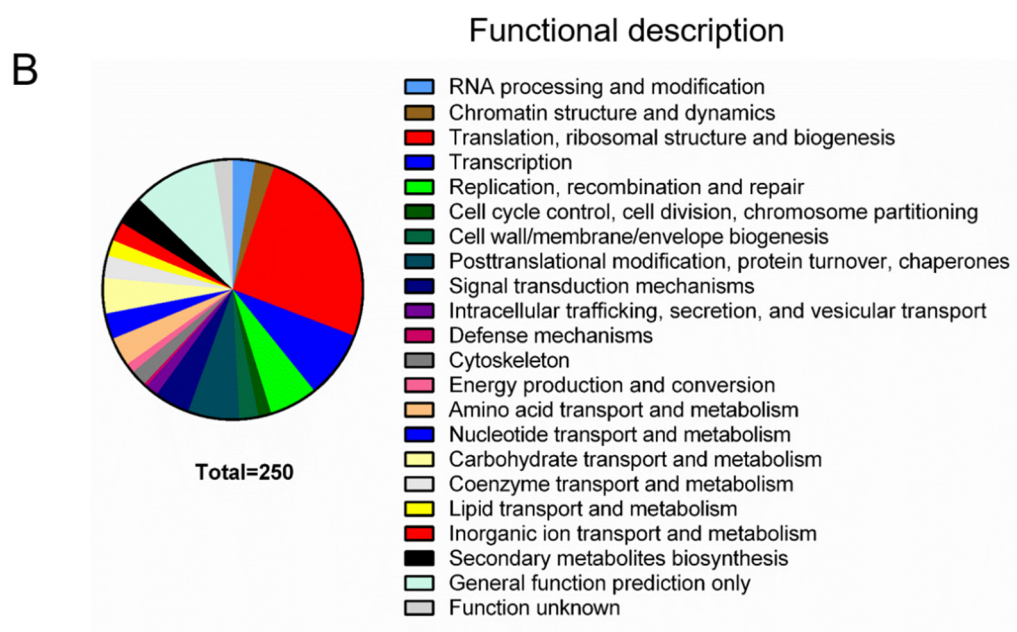

**Figure S6.** Overview of upregulated (A) and downregulated (B) genes in comparisons between  $\Delta BbPlin1$  and *B. bassiana* wild type strains, and categorized according to putative functions gathered from Fungal Genome Database FunCat.

**Table S1.** Primers used in this study

| Primer            | Sequence (5'–3')                                       |                        |
|-------------------|--------------------------------------------------------|------------------------|
| P1–F              | tatgaccatgattacgaattcaaattcgacgacaggggtacg             | Mutant construction LB |
| P1–R              | tctgtcgacactagtgaattccgggtgcctgttattgttct              | Mutant construction LB |
| P2–F              | gaggtaatccttctttctagatgtcgagatatccactcc                | Mutant construction RB |
| P2–R              | tgctgcagggtcgactctagacatcatccgaccttgact                | Mutant construction RB |
| P3–F              | gggaattctccttcattggcgcggtta                            | Fusion construction    |
| P3–R              | accagaaccacctgggtgattttctccttgac                       | Fusion construction    |
| P4–F              | tcaaccaggggtggttctggtggtggttctggtatggtgagcaagggcgagga  | eGFP                   |
| P4–R              | agtctagatacttgtagagctcggtcca                           | eGFP                   |
| P5–F              | ttgcacctatcgacgagtc//ttctccttgacctctgggt               | Mutant screening       |
| P6–F              | tgcgaggactgctatcaatg//atccaagtcacgccatttc              | Mutant screening       |
| Bbcale–RT– F/–R   | Gtccttatgacgacgacgcttc//ccgtgaggtgttcgtatga            | Real–time PCR primers  |
| BbPlin1–RT–F/–R   | ctacttctccaagccctacc//actctgcgtttagacttcg              | Real–time PCR primers  |
| Actin–RT–F/–R     | ttggtgcgaaacttcagcgtctagtc//tccagcaaatgtggatctccaagcag | Actin primers          |
| DGA1–RT–F/–R      | aagcttttcgccggatattt//gcgaaagtggagtcagag               | Real–time PCR primers  |
| Tgl–RT–F/–R       | ggctcgttgacaaacaaat//gcgacaagtgaagcaatcaa              | Real–time PCR primers  |
| Enoyl–CoA–RT–F/–R | taatagcacgtttgaggcgc//ttgttctccaggctcgtct              | Real–time PCR primers  |

**Table S2.** The KEGG pathway analysis of DEGs involved in lipid metabolism

| Pathway ID | Description                                                | Gene number<br>( $\Delta$ BbPlin1/WT_UP) | Gene number<br>( $\Delta$ BbPlin1/WT_UP) |
|------------|------------------------------------------------------------|------------------------------------------|------------------------------------------|
| Map00071   | Fatty acid degradation                                     | 2                                        | 1                                        |
| Map00061   | Fatty acid biosynthesis                                    | 1                                        |                                          |
| Map00062   | Fatty acid elongation                                      | 1                                        | 1                                        |
| map00564   | Glycerophospholipid metabolism                             | 3                                        | 1                                        |
| map00561   | Glycerolipid metabolism                                    | 7                                        | 0                                        |
| map00563   | Glycosylphosphatidylinositol (GPI)–<br>anchor biosynthesis | 2                                        | 0                                        |
| map00600   | Sphingolipid metabolism                                    | 1                                        | 4                                        |
| map01040   | Biosynthesis of unsaturated fatty acids                    | 2                                        | 0                                        |
